# Supplementary material
Source: PubMed Central journal article supplement (PMC5261825)
Supplement: NIHMS835690-supplement-004738_-_Supplemental_Material.pdf [file NIHMS835690-supplement-004738_-_Supplemental_Material.pdf]

## Supplemental Material

**Supplementary Table 1.** Baseline Characteristics of Participants Included and Excluded from Study

| Demographic and Clinical Characteristics  | Study Sample<br>(N=3,819) | Excluded<br>(N=2,995) |
|-------------------------------------------|---------------------------|-----------------------|
| Age, year                                 | 61.2±10.0                 | 63.3±10.4             |
| Male gender, n (%)                        | 1,774 (46.5)              | 1,439 (48.0)          |
| Race/ethnicity, n (%)                     |                           |                       |
| Caucasian                                 | 1,485 (38.9)              | 1,137 (38.0)          |
| African American                          | 976 (25.6)                | 917 (30.6)            |
| Hispanic                                  | 859 (22.5)                | 637 (21.3)            |
| Chinese                                   | 499 (13.1)                | 304 (10.2)            |
| Education level, n (%)                    |                           |                       |
| Less than high school                     | 636 (16.7)                | 589 (19.8)            |
| High school/GED                           | 690 (18.1)                | 546 (18.4)            |
| Less than college (more than high school) | 1,100 (28.8)              | 837 (28.2)            |
| Bachelor degree                           | 685 (17.9)                | 486 (16.4)            |
| Graduate degree                           | 708 (18.5)                | 514 (17.3)            |
| Body mass index, kg/m <sup>2</sup>        | 27.9±5.0                  | 29.0±6.0              |
| Smoking status, n (%)                     |                           |                       |
| Never                                     | 2,017 (52.8)              | 3,418 (50.3)          |
| Former                                    | 1,343 (35.2)              | 1,144 (38.5)          |
| Current                                   | 459 (12.0)                | 428 (14.4)            |
| Smoking pack-years                        | 10.7±23.0                 | 12.3±21.3             |
| Diabetes mellitus, n (%)                  | 432 (11.3)                | 427 (14.2)            |
| Hypertension, n (%)                       | 1,616 (42.3)              | 1,442 (48.1)          |
| Medications, n (%)                        |                           |                       |
| RAAS inhibitor                            | 632 (16.5)                | 601 (20.1)            |
| -blocker                                  | 352 (9.2)                 | 297 (9.9)             |
| Anti-arrhythmic                           | 21 (0.5)                  | 15 (0.5)              |

GED, general education development test; RAAS, renin angiotensin aldosterone system

**Supplementary Table 2.** Proportional Hazards Models for Right Ventricular Structure and Function and Incident Atrial Fibrillation in Participants with Lung Function Assessment

|                   | <b>HR</b> | <b>95% CI</b> | <b>P</b> |
|-------------------|-----------|---------------|----------|
| <b>RV EF</b>      |           |               |          |
| Unadjusted        | 1.29      | 1.11 – 1.49   | <0.001   |
| Adjusted*         | 1.21      | 1.03 – 1.43   | 0.02     |
| Adjusted + LV EF  | 1.23      | 1.03 – 1.46   | 0.02     |
| <b>RV EDM</b>     |           |               |          |
| Unadjusted        | 0.97      | 0.84 – 1.12   | 0.70     |
| Adjusted†         | 1.31      | 1.09 – 1.57   | 0.004    |
| Adjusted + LV EDM | 1.26      | 1.04 – 1.54   | 0.02     |
| <b>RV EDV</b>     |           |               |          |
| Unadjusted        | 0.98      | 0.85 – 1.14   | 0.82     |
| Adjusted*         | 1.27      | 1.04 – 1.55   | 0.02     |
| Adjusted + LV EDV | 1.14      | 0.88 – 1.46   | 0.32     |
| <b>RV ESV</b>     |           |               |          |
| Unadjusted        | 0.85      | 0.73 – 1.00   | 0.04     |
| Adjusted*         | 0.99      | 0.81 – 1.20   | 0.88     |
| Adjusted + LV ESV | 0.93      | 0.75 – 1.14   | 0.47     |

Hazard ratios are per standard deviation increase. \*Adjustment is for age, sex, race, body mass index, hypertension, diabetes, medication use (RAAS,  $\beta$ -blocker, anti-arrhythmic), smoking (status, pack-years), education level, left ventricular hypertrophy, and forced expiratory volume at one second (FEV<sub>1</sub>). †Initial adjusted model for RV EDM does not include adjustment for left ventricular hypertrophy; adjustment for LV mass (LV EDM) is performed subsequently. HR, hazard ratio; CI, confidence interval; RV, right ventricular; LV, left ventricular; EF, ejection fraction; EDM, end-diastolic mass; EDV, end-diastolic volume; ESV, end-systolic volume.

**Supplementary Table 3.** Proportional Hazards Models for Right Ventricular Function with Adjustment for Left Atrial Volume: Nested Case:Control Analysis

|                         | <b>HR</b> | <b>95% CI</b> | <b>P</b> |
|-------------------------|-----------|---------------|----------|
| <b>RV EF</b>            |           |               |          |
| Age, Sex Adjusted       | 1.31      | 1.10 – 1.56   | 0.002    |
| Multivariable Adjusted* | 1.38      | 1.14 – 1.66   | <0.001   |
| Adjusted + LA volume    | 1.27      | 1.06-1.53     | 0.011    |

Hazard ratios are per standard deviation increase. \*Adjustment is for age, sex, race, body mass index, hypertension, diabetes, medication use (RAAS, -blocker, anti-arrhythmic), smoking (status, pack-years), education level, and left ventricular hypertrophy. HR, hazard ratio; CI, confidence interval; RV, right ventricular; EF, ejection fraction.
